# Supplementary material
Source: PubMed Central journal article supplement (PMC4352771)
Supplement: pnas.201417262SI.pdf [file pnas.201417262SI.pdf]

# Supporting Information

Wolkenstein 10.1073/pnas.1417262112

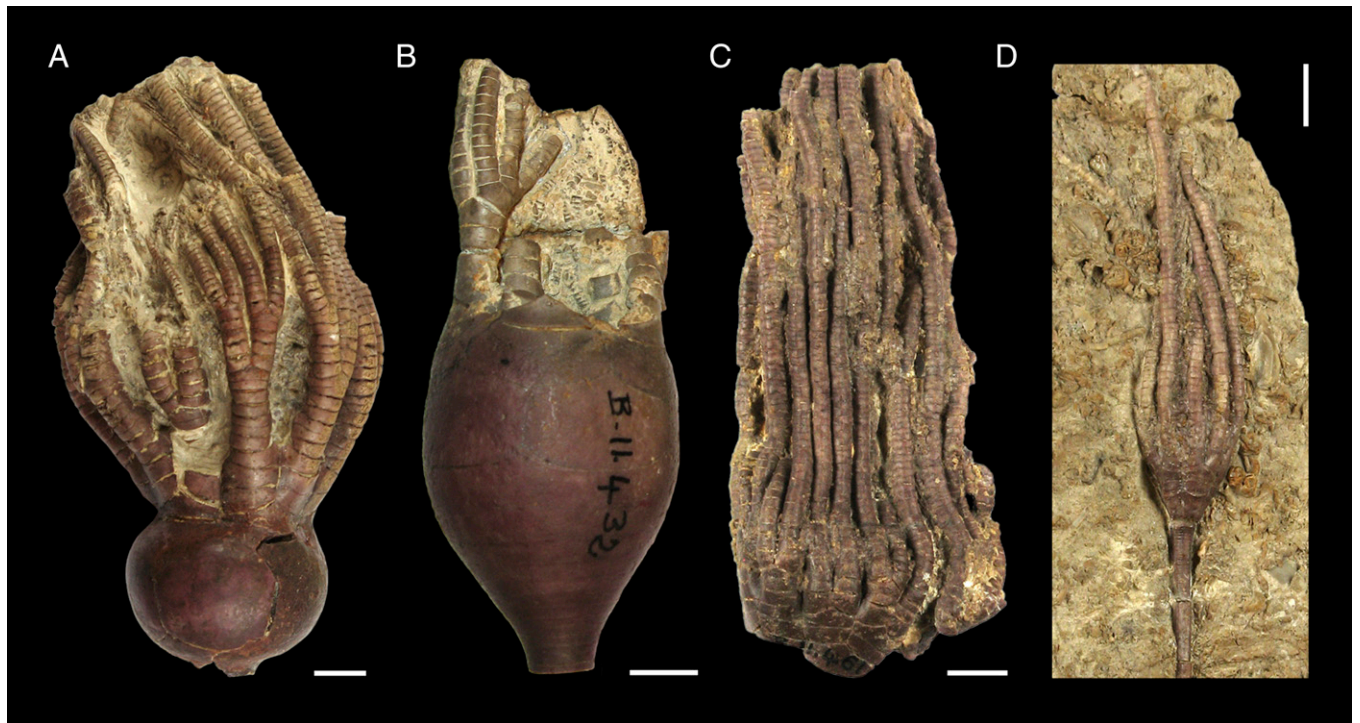

**Fig. S1.** Examples of millerocrinids from the Lower Kimmeridgian of the La Rochelle area (western France) with distinct purple to violet coloration. (A) *Pomatocrinus magnificus* (lectotype, MNHN B11439). (B) *Apiocrinites roissyanus* (lectotype, MNHN B11432). (C) *Liliocrinus polydactylus* (syntype, MNHN B11461). (D) *Angulocrinus gracilis* (lectotype, MNHN B11447). (A) La Jarrie near La Rochelle; (B–D) Angoulins near La Rochelle. (Scale bar, 1 cm.) In addition to the shown species, purple to violet coloration was observed in the millerocrinids *Guettardocrinus dilatatus* (syntype, MNHN A25646), *Pomatocrinus fleuriausianus* (holotype, MNHN B11453), *Pomatocrinus insignis* (lectotype, MNHN B11442), *Liliocrinus murchisonianus* (holotype, MNHN B11441), *Angulocrinus angulatus* (lectotype, MNHN B11459), *Angulocrinus brevis* (holotype, MNHN B11462), *Angulocrinus inaequalis* (paralectotype, MNHN A09212), *Angulocrinus orbigny* (holotype, MNHN B11457), and *Angulocrinus simplex* (lectotype, MNHN B11444).

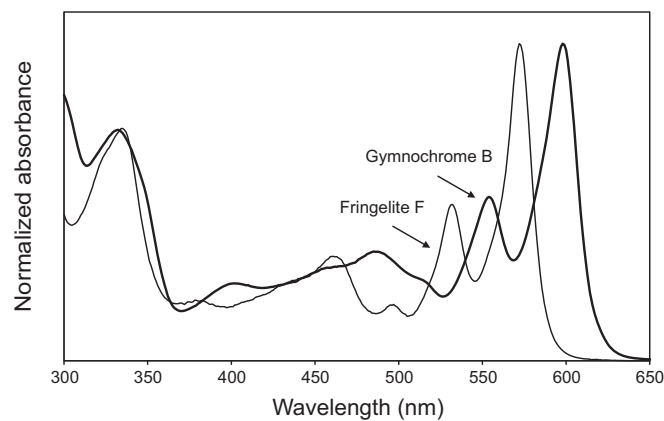

**Fig. S2.** UV-visible spectra of hypericinoid pigments from fossil and extant isocrinids (fringelite F from *Pentacrinites* and gymnochrome B from *Saracrinus*, Fig. 2).

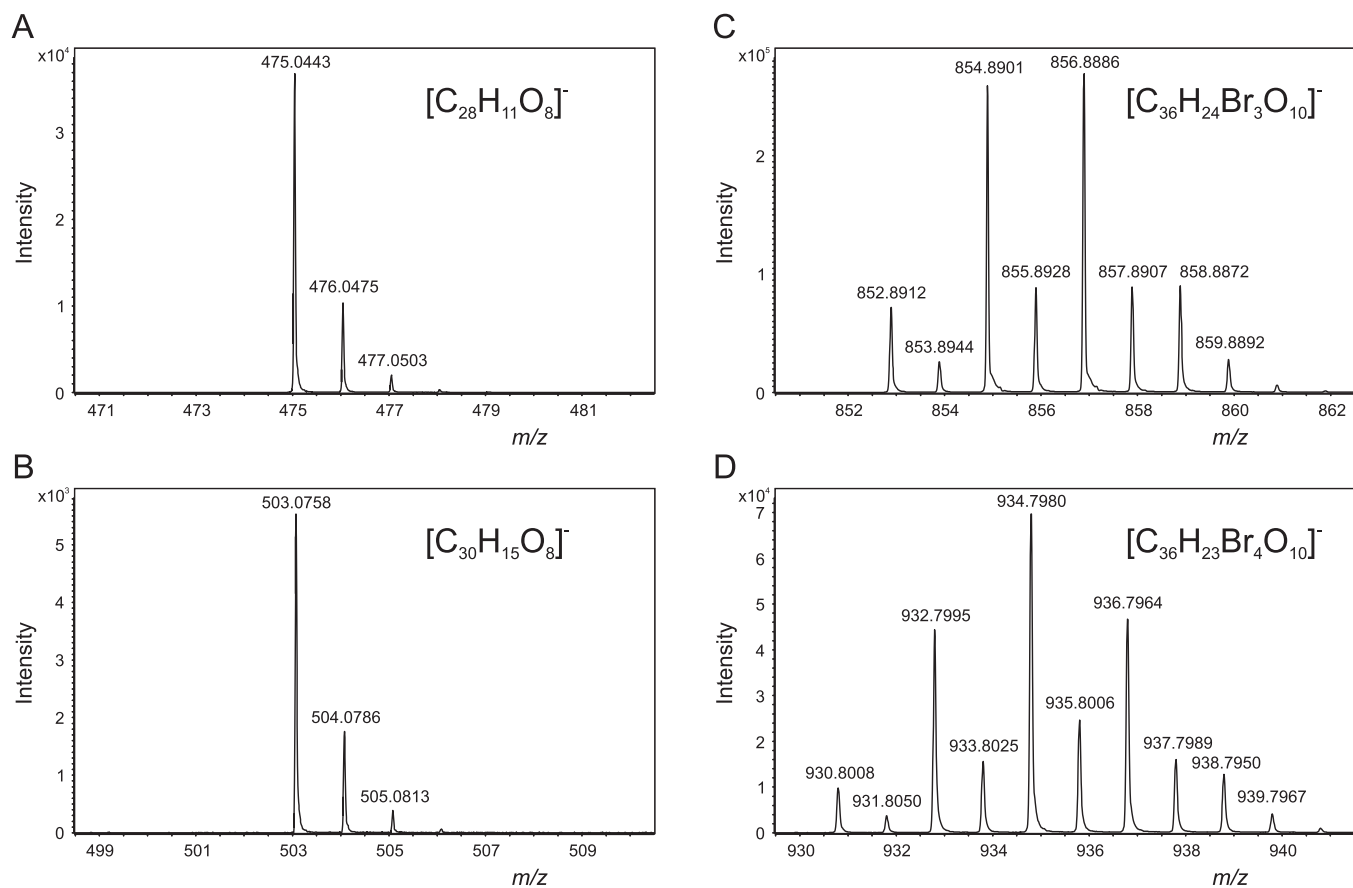

**Fig. S3.** Negative-ion electrospray ionization (ESI) mass spectra of hypericinoid pigments from fossil and extant isocrinids showing isotopic patterns that are characteristic for the number of bromine atoms in the molecules. (A) Fringelite F from *Pentacrinites* (Fig. 2A). (B) Hypericin from *Pentacrinites* (Fig. 2A). (C) Gymnochrome B from *Saracrinus* (Fig. 2B). (D) Gymnochrome A from *Saracrinus* (Fig. 2B).

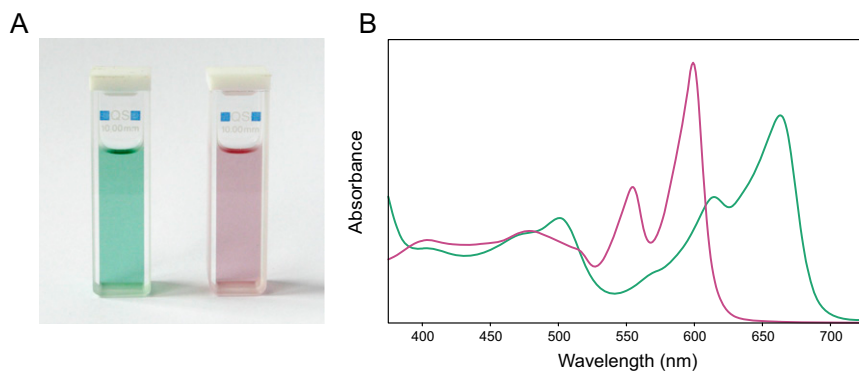

**Fig. S4.** pH-dependent absorption behavior of hypericinoid pigments (crude pigment isolate) of the extant isocrinid *Saracrinus*. (A) Pigments dissolved in ethanol (left cuvette) and pigments dissolved in ethanol containing 1% 1 M HCl (right cuvette). (B) UV-visible spectra of pigments dissolved in ethanol (green line) and pigments dissolved in ethanol containing 1% 1 M HCl (violet line).



Table S1. Cont.

| Species                            | Description                       | Stratigraphy                                                                  | Locality                                                         | Collection no.             | Sediment (ref.)                                                                    | Coloration of fossil | Sample amount, g | Hypericinoids* | Hypericinoid concentrations, ppm of fossil |           |
|------------------------------------|-----------------------------------|-------------------------------------------------------------------------------|------------------------------------------------------------------|----------------------------|------------------------------------------------------------------------------------|----------------------|------------------|----------------|--------------------------------------------|-----------|
|                                    |                                   |                                                                               |                                                                  |                            |                                                                                    |                      |                  |                | Fringelite F                               | Hypericin |
| <i>Comatulida</i>                  |                                   |                                                                               |                                                                  |                            |                                                                                    |                      |                  |                |                                            |           |
| <i>Solanocrinites</i> sp.          | Partial specimen                  | Upper Jurassic, Upper Kimmeridgian–Lower Tithonian, Tendaguru Formation       | Tendaguru, Tanzania                                              | NHMUK E25454               | Light-brown sandstone (2)                                                          | Violet               | 0.2              | 5, 7, 8, 9, 10 | 113.6                                      | <1.0      |
| <i>Solanocrinites beltremieuxi</i> | Several specimens on slab         | Upper Jurassic, Lower Kimmeridgian                                            | Saint-Clément-des-Baleines, Île de Ré, Charente-Maritime, France | SMNS 67702                 | Buff-colored limestone                                                             | Violet               | 0.1              | 5, 8, 9, 10    | 28.2                                       | 9.5       |
| <i>Isocrinida</i>                  |                                   |                                                                               |                                                                  |                            |                                                                                    |                      |                  |                |                                            |           |
| <i>Pentacrinites dargniesi</i>     | Crown fragment                    | Middle Jurassic, Upper Bathonian, Forest Marble Formation                     | Malmesbury, Wiltshire, United Kingdom                            | NHMUK E60                  | Crinoid lens, embedding sediment not documented                                    | Violet               | 1.4              | 5, 7, 8, 9, 10 | 13.7                                       | 0.2       |
| <i>Hispidocrinites leuthardtii</i> | Crown fragment                    | Middle Jurassic, Lower Bathonian, Varians Beds                                | Liestal (Sichtern), Canton Basel-Landschaft, Switzerland         | NMB M 11146                | Crinoid lens within marlstone succession (10)                                      | Violet               | 2.3              | 5, 7, 8, 9, 10 | 23.7                                       | <0.1      |
| <i>Pentacrinites dargniesi</i>     | Crown fragment                    | Middle Jurassic, Upper Bajocian, Hauptrogenstein Formation                    | Develier, Canton Jura, Switzerland                               | NMB M 6093                 | Crinoid lens within oolitic succession (10)                                        | Violet               | 3.0              | 5, 7, 8, 9     | 23.3                                       | <0.1      |
| <i>Encrinida</i>                   |                                   |                                                                               |                                                                  |                            |                                                                                    |                      |                  |                |                                            |           |
| <i>Chelocrinites schlottheimi</i>  | Stalk fragment                    | Middle Triassic, Upper Anisian, Trochitenkalk Formation, Gelbe Basisschichten | Willebadessen, North Rhine-Westphalia, Germany                   | SMNS 75557                 | Gray brown limestone                                                               | Violet               | 0.6              | 5, 8, 9, 10    | 3.7                                        | 0.4       |
| <i>Encrinus</i> cf. <i>brahli</i>  | Partial crown with proximal stalk | Middle Triassic, Lower Anisian, Jena Formation, Basiskonglomeratbänke         | Weißeborn near Göttingen, Lower Saxony, Germany                  | SMNS 75556                 | Gray bioclastic, intraclast-bearing limestone (reworked hardground) (11)           | Violet               | 0.1              | 5, 7           | 16.4                                       | n.d.      |
| <i>Monobathrida</i>                |                                   |                                                                               |                                                                  |                            |                                                                                    |                      |                  |                |                                            |           |
| <i>Strimblecrinites inornatus</i>  | Crown fragment                    | Lower Carboniferous, Kinderhookian, Maynes Creek Formation                    | LeGrand, Iowa                                                    | FMNH PE 60748              | Intraclastic crinoidal grainstone overlain by thin-bedded, dolomitic mudstone (12) | Gray–violet          | 2.6              | n.d.           | n.d.                                       | n.d.      |
| Order indet.                       |                                   |                                                                               |                                                                  |                            |                                                                                    |                      |                  |                |                                            |           |
| <i>Crinoidea</i>                   | Stalk fragment                    | Silurian, Ludlovian                                                           | Burgen, Gotland, Sweden                                          | SMNS, uncataloged specimen | Gray bioclastic limestone                                                          | Gray–violet          | 1.2              | n.d.           | n.d.                                       | n.d.      |

n.d., not determined. Limits of detection (ESI-MS): fringelite F, 29 ppb; hypericin, 5 ppb.

\*Molecular formulas of indicated compounds are listed in Table S3.

1. Wings O (2000) [A hardground as a new aspect in the interpretation of the Lower Tithonian Solnhofen Plattenkalk]. *Archaeopteryx* 18:75–92. German.

2. Bussert R, Heinrich W-D, Aberhan M (2009) The Tendaguru Formation (Late Jurassic to Early Cretaceous, southern Tanzania): Definition, palaeoenvironments, and sequence stratigraphy. *Fossil Record* 12(2):141–174.

3. Fürsich F, Werner W (1991) Palaeoecology of coralline sponge-coral meadows from the Upper Jurassic of Portugal. *Paläontol Z* 65(1–2):35–69.
4. Olivier N, et al. (2003) Microbialite morphology, structure and growth: A model of the Upper Jurassic reefs of the Chay Peninsula (Western France). *Palaeogeogr Palaeoclimatol Palaeoecol* 193(3–4):383–404.
5. Loreau J-P, Tintant H (1968) [The limestone of Tonnerre and adjacent Upper Jurassic formations of Yonne: Stratigraphic and paleontologic observations]. *Bull Soc Géol Fr Sér 7* 10:341–357. French.
6. Thuy B, Marty D, Comment G (2013) A remarkable example of a Late Jurassic shallow-water ophiuroid assemblage from the Swiss Jura Mountains. *Swiss J Geosci* 106(2):409–426.
7. Ausich WJ, Wilson MA (2012) New Tethyan Apicrinithidae (Crinoidea, Articulata) from the Jurassic of Israel. *J Paleontol* 86(6):1051–1055.
8. Palmer TJ, Fürsich FT (1974) The ecology of a Middle Jurassic hardground and crevice fauna. *Palaeontology* 17(3):507–524.
9. Taylor PD (1983) *Aisacrinus* gen. nov., an aberrant millericrinid from the Middle Jurassic of Britain. *Bull Br Mus Nat Hist Geol Ser* 37(2):37–77.
10. Hess H (1999) Middle Jurassic of Northern Switzerland. *Fossil Crinoids*, eds Hess H, Ausich WJ, Brett CE, Simms MJ (Cambridge Univ Press, Cambridge, UK), pp 203–215.
11. Bieleert U, Bieleert F (1995) [Encrinurids from the Basiskonglomerat beds of the Lower Muschelkalk of Weißenborn (Lower Saxony)]. *Der Aufschluß* 46(1):23–31. German.
12. Gahn FJ, Baumiller TK (2004) A bootstrap analysis for comparative taphonomy applied to Early Mississippian (Kinderhookian) crinoids from the Wasonville Cycle of Iowa. *Palaios* 19(1):17–38.

**Table S2. Hypericinoid pigment occurrence in colored extant crinoids**

| Species                                                 | Locality                            | Coordinates                                        | Depth, m    | Collection no.                                                                 | Natural color of crinoid (ref.) | Hypericinoids*                                   |
|---------------------------------------------------------|-------------------------------------|----------------------------------------------------|-------------|--------------------------------------------------------------------------------|---------------------------------|--------------------------------------------------|
| <b>Cyrtocrinida</b>                                     |                                     |                                                    |             |                                                                                |                                 |                                                  |
| <i>Cyathidium foresti</i>                               | Southern Faial Channel, Azores      | 38°30'N, 28°40'W                                   | 500         | MB.E 3333                                                                      | Dark green (1)                  | 8, 9, 12, 13, 15, 19                             |
| <b>Hyocrinida</b>                                       |                                     |                                                    |             |                                                                                |                                 |                                                  |
| <i>Ptilocrinus amezianeae</i>                           | Kerguelen Plateau                   | 46°56.892'S, 70°25.422'E                           | 544         | MNHN-IE-2013-10376, MNHN-IE-2013-10377, MNHN-IE-2013-10378, MNHN-IE-2013-10379 | Yellow-orange (2)               | n.d.                                             |
| <b>Comatulida</b>                                       |                                     |                                                    |             |                                                                                |                                 |                                                  |
| <i>Porphyrocrinus cf. verrucosus</i>                    | Osprey Reef, Australia              | 13°49.560'S, 46°32.520'E                           | 498         | LMU GW1168                                                                     | Orange                          | n.d.                                             |
| <b>Isocrinida</b>                                       |                                     |                                                    |             |                                                                                |                                 |                                                  |
| <i>Proisocrinus ruberrimus</i>                          | Aguni Knoll, central Okinawa Trough | 27°00.71'N, 126°37.02'E                            | 1,803–1,804 | UMUT RE 29475                                                                  | Red (3)                         | n.d.                                             |
| <i>Saracrinus nobilis</i>                               | Western Pacific                     | 31°24.33'N, 131°35.92'E to 31°24.18'N, 131°35.71'E | 295–306     | NUM-Az648a, NUM-Az648b, NUM-Az648c, NUM-Az648d                                 | Dark green to almost black      | 2, 3, 6, 7, 8, 9, 10, 11, 12, 13, 14, 15, 17, 19 |
| <i>Metacrinus levii</i>                                 | New Caledonia                       | 22°45'S, 167°09'E                                  | 380–395     | MNHN EcPs 74                                                                   | Dark green                      | 10, 13, 15                                       |
| <i>Metacrinus musorstomae</i>                           | Bohol Sea, Philippines              | 9°39'N, 123°48'E                                   | 255–268     | MNHN-IE-2007-5                                                                 | Not documented                  | 11, 13, 14, 15, 17, 19                           |
| <i>Endoxocrinus (Diplocrinus) wyvillethomsoni</i>       | Bay of Biscay                       | 48°41'N, 10°53'W                                   | 1,420–1,470 | MNHN-IE-2012-836                                                               | Dark green                      | 1, 2, 8, 9, 12, 15                               |
| <i>Endoxocrinus (Diplocrinus) alternicirrus sibogae</i> | New Caledonia                       | 23°34'S, 169°36.8'E                                | 700         | MNHN EcPh 69                                                                   | Not documented                  | n.d.                                             |
| <i>Hypalocrinus naresianus</i>                          | Shima Spur, Kumano-nada Sea, Japan  | 33°59.6'N, 136°55.1'E to 33°58.9'N, 136°55.9'E     | 763–796     | ZMB Ech 7415                                                                   | Dark green                      | 2, 3, 4, 5, 10, 11, 13, 14, 16, 17, 18, 19, 20   |

n.d., not determined.

\*Molecular formulas of indicated compounds are listed in Table S4.

1. Wisshak M, Neumann C, Jakobsen J, Freiwald F (2009) The 'living-fossil community' of the cyrtocrinid *Cyathidium foresti* and the deep-sea oyster *Neopycnodonte zibrowii* (Azores Archipelago). *Palaeogeogr Palaeoclimatol Palaeoecol* 271(1–2):77–83.
2. Eléaume M, Hemery LG, Bowden DA, Roux M (2011) A large new species of the genus *Ptilocrinus* (Echinodermata, Crinoidea, Hyocrinidae) from Antarctic seamounts. *Polar Biol* 34(9): 1385–1397.
3. Oji T, Kitazawa K (2008) Discovery of two rare species of stalked crinoids from Okinawa Trough, southwestern Japan, and their systematic and biogeographic implications. *Zoolog Sci* 25(1):115–121.

**Table S3. Accurate mass data of hypericinoid pigments from fossil crinoids (Fig. 2A and Table S1)**

| Peak (compound)  | Molecular formula, [M–H] <sup>–</sup>          | m/z calculated | m/z observed |
|------------------|------------------------------------------------|----------------|--------------|
| 2                | C <sub>28</sub> H <sub>11</sub> O <sub>6</sub> | 443.0561       | 443.0558     |
| 5 (fringelite F) | C <sub>28</sub> H <sub>11</sub> O <sub>8</sub> | 475.0459       | 475.0471     |
| 7, 9             | C <sub>29</sub> H <sub>13</sub> O <sub>8</sub> | 489.0616       | 489.0619     |
| 1, 4             | C <sub>28</sub> H <sub>11</sub> O <sub>9</sub> | 491.0409       | 491.0410     |
| 8 (hypericin)    | C <sub>30</sub> H <sub>15</sub> O <sub>8</sub> | 503.0772       | 503.0772     |
| 10               | C <sub>31</sub> H <sub>17</sub> O <sub>8</sub> | 517.0929       | 517.0929     |
| 3, 6             | C <sub>30</sub> H <sub>15</sub> O <sub>9</sub> | 519.0722       | 519.0724     |

Mass data are from millericrinid, Upper Jurassic, Tanzania.

**Table S4. Accurate mass data of hypericinoid pigments from extant crinoids (Fig. 2B and Table S2)**

| Peak (compound)        | Molecular formula, [M-H] <sup>-</sup>                             | <i>m/z</i> calculated, monoisotopic | <i>m/z</i> observed, monoisotopic |
|------------------------|-------------------------------------------------------------------|-------------------------------------|-----------------------------------|
| 7                      | C <sub>36</sub> H <sub>25</sub> Br <sub>2</sub> O <sub>10</sub>   | 774.9820                            | 774.9806 (S)                      |
| 8                      | C <sub>38</sub> H <sub>29</sub> Br <sub>2</sub> O <sub>10</sub>   | 803.0133                            | 803.0111 (S)                      |
| 6                      | C <sub>34</sub> H <sub>20</sub> Br <sub>3</sub> O <sub>10</sub>   | 824.8612                            | 824.8593 (S)                      |
| 9, 11 (gymnochrome B)  | C <sub>36</sub> H <sub>24</sub> Br <sub>3</sub> O <sub>10</sub>   | 852.8925                            | 852.8912 (S)                      |
| 12                     | C <sub>38</sub> H <sub>28</sub> Br <sub>3</sub> O <sub>10</sub>   | 880.9238                            | 880.9241 (E)                      |
| 10                     | C <sub>34</sub> H <sub>19</sub> Br <sub>4</sub> O <sub>10</sub>   | 902.7717                            | 902.7696 (S)                      |
| 13, 14 (gymnochrome A) | C <sub>36</sub> H <sub>23</sub> Br <sub>4</sub> O <sub>10</sub>   | 930.8030                            | 930.8014 (H)                      |
| 16                     | C <sub>36</sub> H <sub>21</sub> Br <sub>4</sub> O <sub>11</sub>   | 944.7823                            | 944.7809 (H)                      |
| 15, 17, 19             | C <sub>38</sub> H <sub>27</sub> Br <sub>4</sub> O <sub>10</sub>   | 958.8343                            | 958.8323 (S)                      |
| 18                     | C <sub>38</sub> H <sub>25</sub> Br <sub>4</sub> O <sub>11</sub>   | 972.8136                            | 972.8118 (H)                      |
| 20                     | C <sub>40</sub> H <sub>29</sub> Br <sub>4</sub> O <sub>11</sub>   | 1000.8449                           | 1000.8425 (H)                     |
| 1                      | C <sub>36</sub> H <sub>23</sub> Br <sub>4</sub> O <sub>13</sub> S | 1010.7598                           | 1010.7608 (E)                     |
| 2, 3                   | C <sub>38</sub> H <sub>27</sub> Br <sub>4</sub> O <sub>13</sub> S | 1038.7911                           | 1038.7899 (E)                     |
| 4                      | C <sub>38</sub> H <sub>25</sub> Br <sub>4</sub> O <sub>14</sub> S | 1052.7704                           | 1052.7670 (H)                     |
| 5                      | C <sub>40</sub> H <sub>29</sub> Br <sub>4</sub> O <sub>14</sub> S | 1080.8017                           | 1080.7946 (H)                     |

Mass data are from the following: E, *Endoxocrinus*; H, *Hypalocrinus*; S, *Saracrinus*.
